# Supplementary material for: Hepatitis B virus genotype, mutations, human leukocyte antigen polymorphisms and their interactions in hepatocellular carcinoma: a multi-centre case-control study
Source: PubMed Central journal article supplement (PMC4644975; doi:10.1038/srep16489), 2015-11-16
Supplement: srep16489-s1.pdf [file srep16489-s1.pdf]

## **Supplementary information**

### **Hepatitis B virus genotype, mutations, human leukocyte antigen polymorphisms and their interactions in hepatocellular carcinoma: a multi-centre case-control study**

Juan Wen, Ci Song, Deke Jiang, Tianbo Jin, Juncheng Dai, Liguozhu, Jiaze An, Yao Liu, Shijie Ma, Na Qin, Cheng Liang, Jiaping Chen, Yue Jiang, Linlin Yang, Jibin Liu, Li Liu, Tingting Geng, Chao Chen, ie Jiang, Jianguo Chen, Fengcai Zhu, Yefei Zhu, Long Yu, Hongbing Shen, Xiangjun Zhai, Jianfeng Xu, Zhibin Hu

## Supplementary Figure

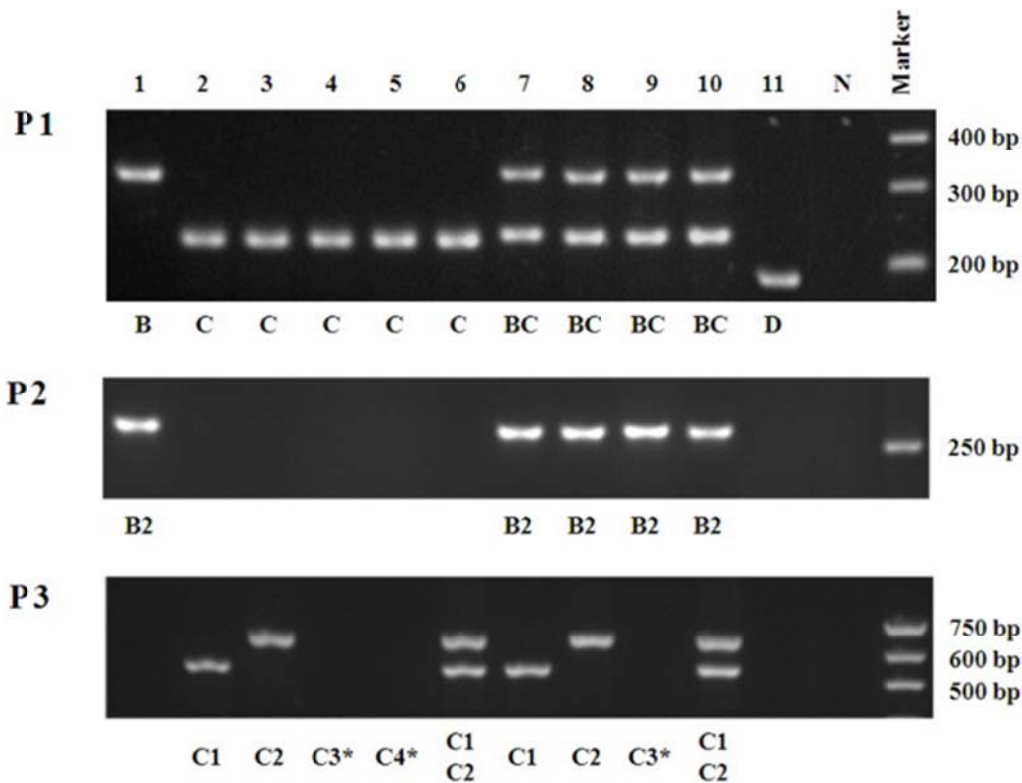

**Supplementary Figure 1.** The nested multiplex PCR specifically detects the HBV genotypes and subgenotypes from all the subjects, including the HCC patients and the HBV persistent carriers. Each lane corresponds to a subject. P1: Lane 1: genotype B; lanes 2-6: genotype C; lanes 7-10: genotype BC (coinfection); lane 11: genotype D. The sizes of the amplicons for the HBV genotypes are: genotype B: 331 bp; genotype C: 242 bp; genotype D: 189 bp. P2: Lanes 1, 7-10: subgenotype B2. P3: lanes 2, 7: subgenotype C1; lanes 3, 8: subgenotype C2; lanes 6, 10: subgenotype C1C2 (coinfection); lanes 4, 5, 9: subgenotypes C3, C4 and C3, respectively, which were detected by sequencing and alignment for the corresponding subgenotype of genotype C that was not detected. The sizes of the amplicons for the subgenotypes are: subgenotype B2: 278 bp; subgenotype C1: 554 bp; subgenotype C2: 652 bp.

### A. HBV B type-specific sequence

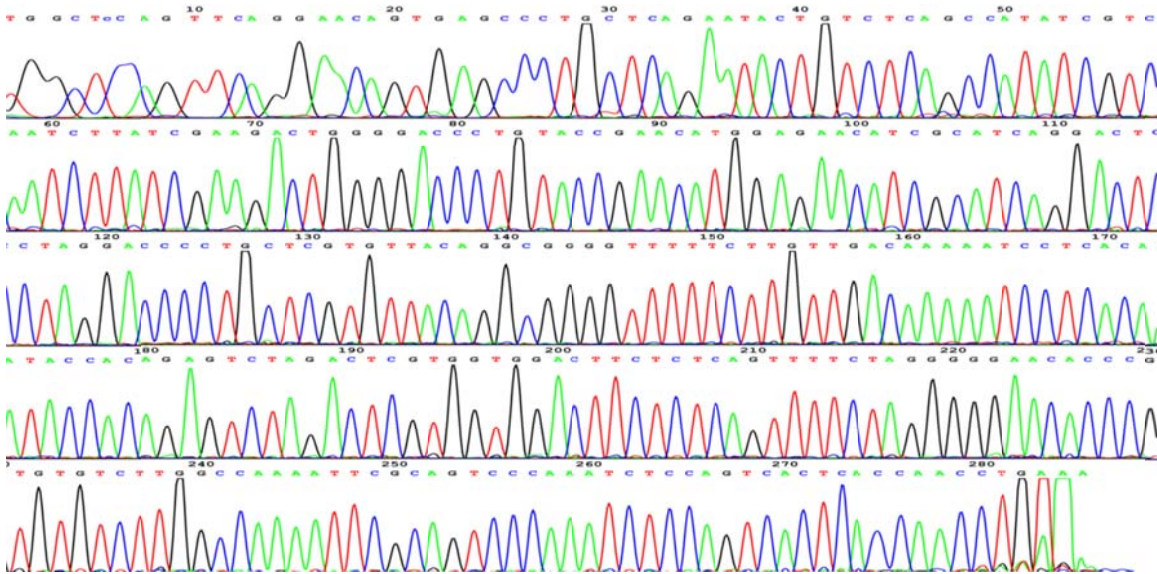

### B. HBV C type-specific sequence

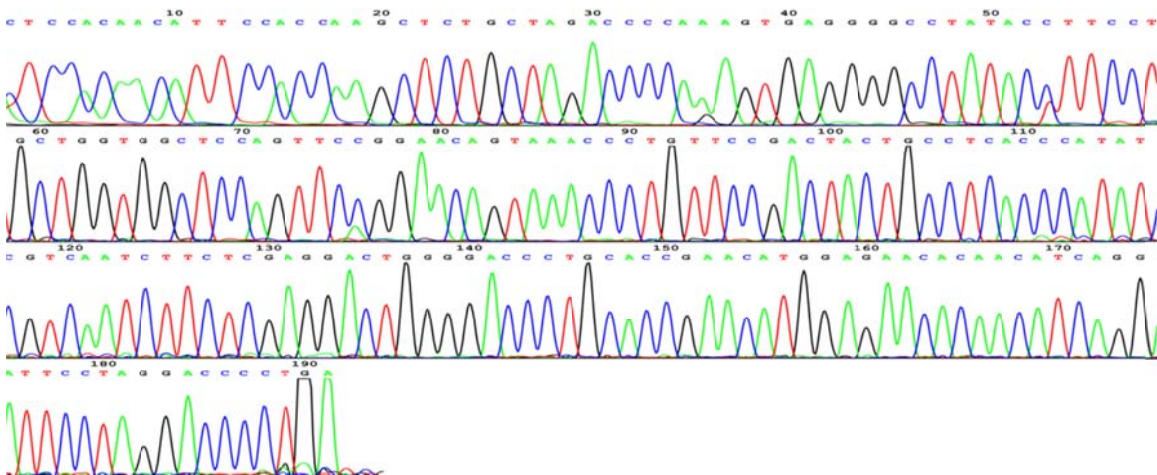

### C. HBV D type-specific sequence

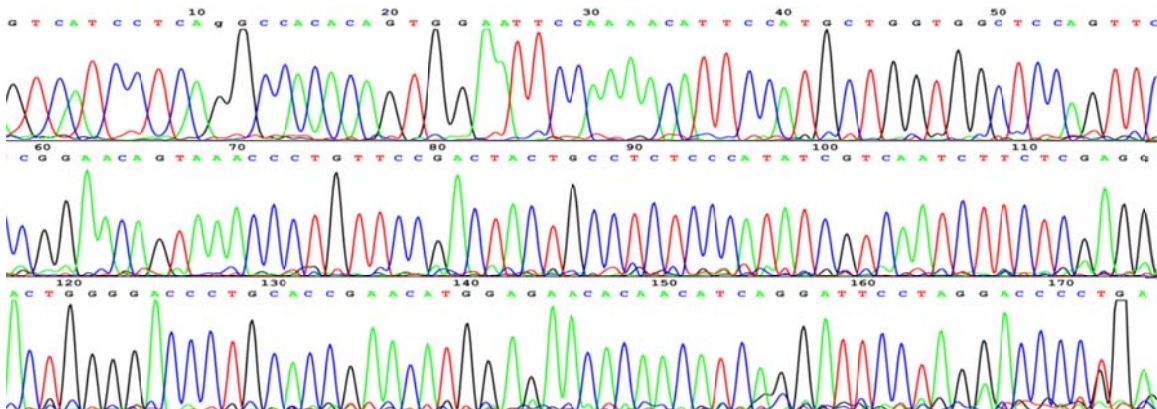



### D. HBV B2 type-specific sequence

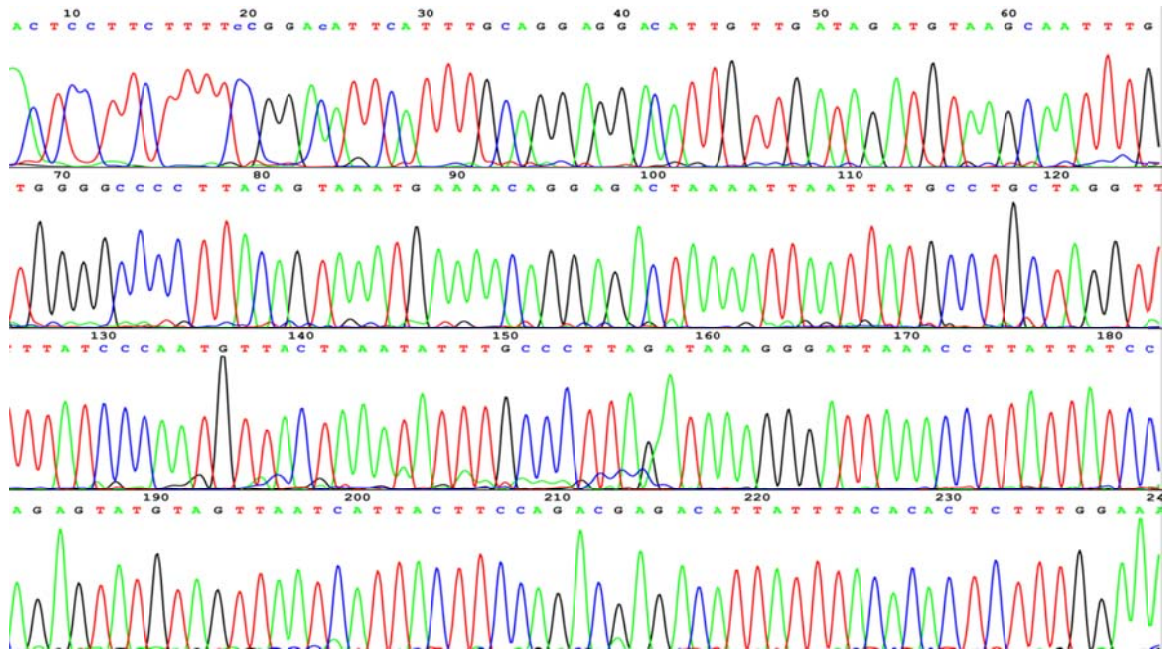

### E. HBV C1 type-specific sequence

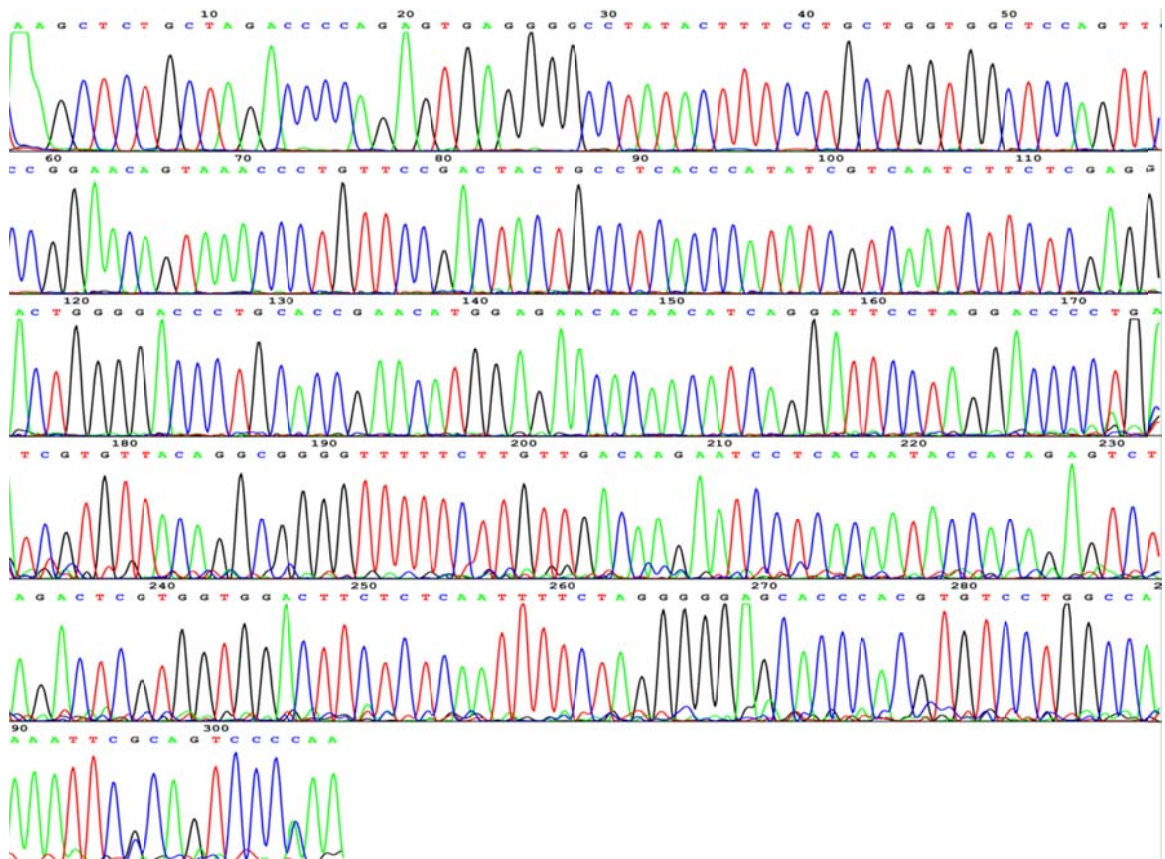

## F. HBV C2 type-specific sequence

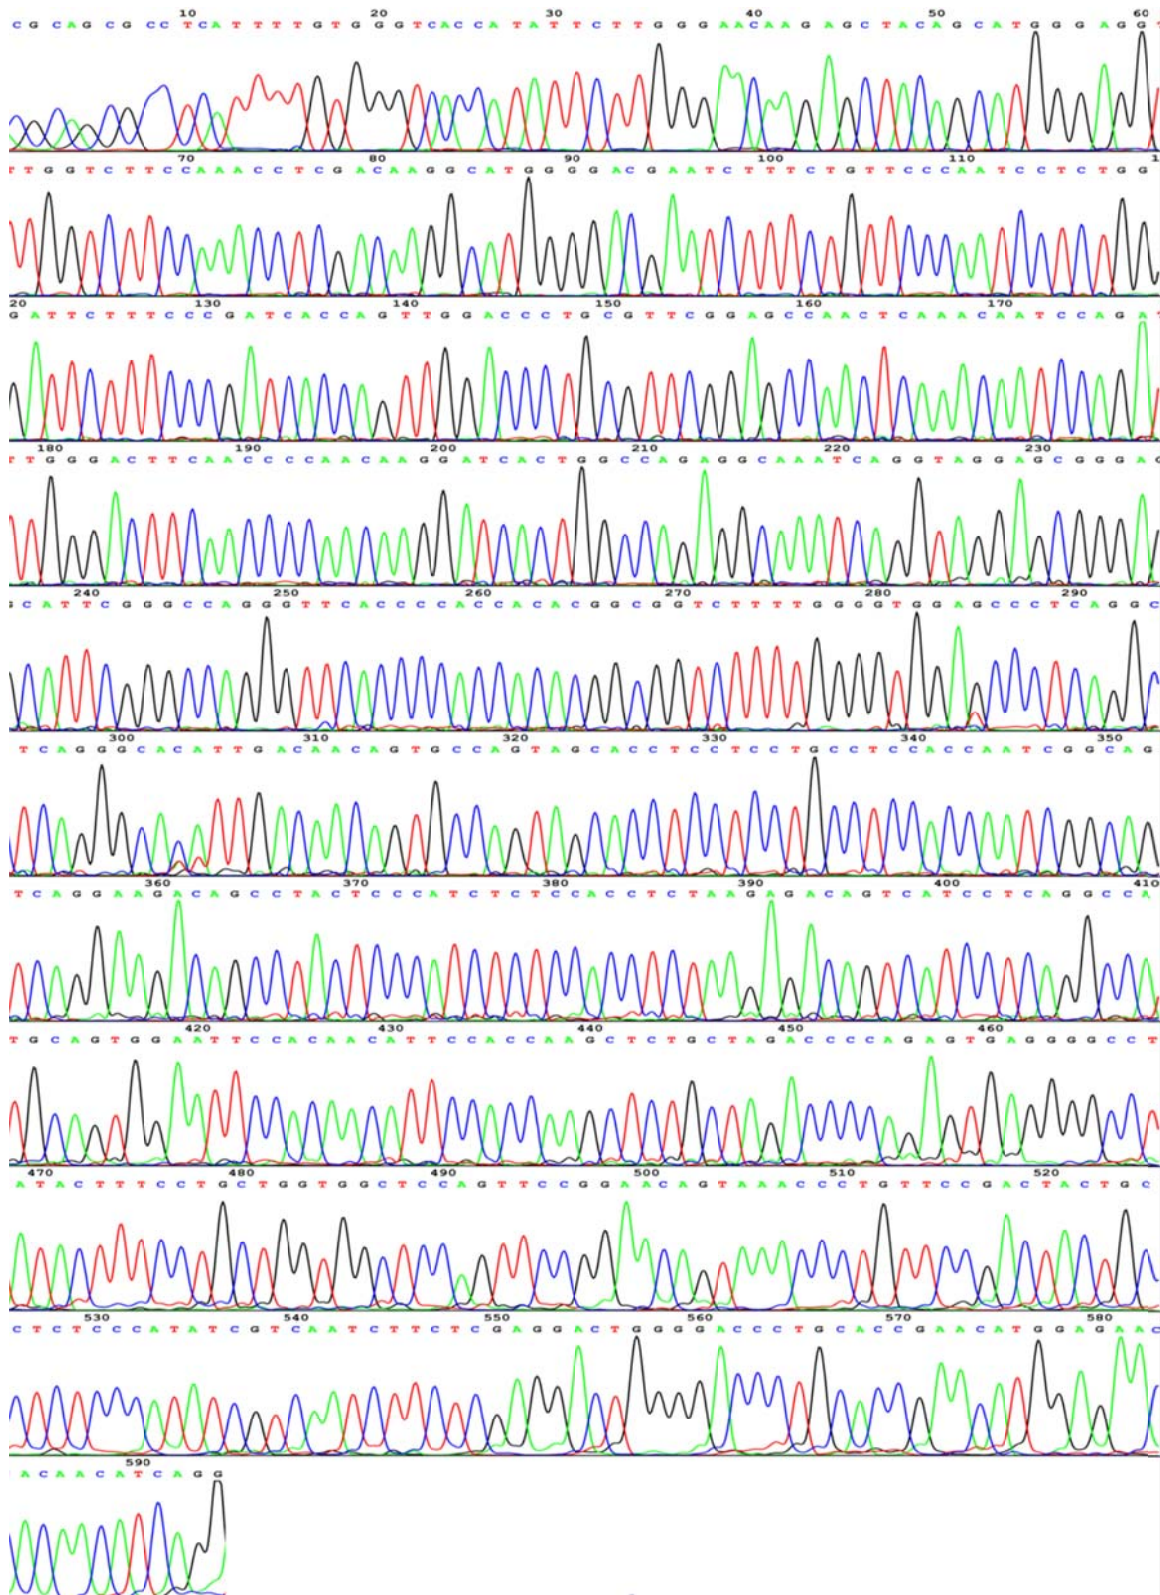



### G. HBV C3 type-specific sequence

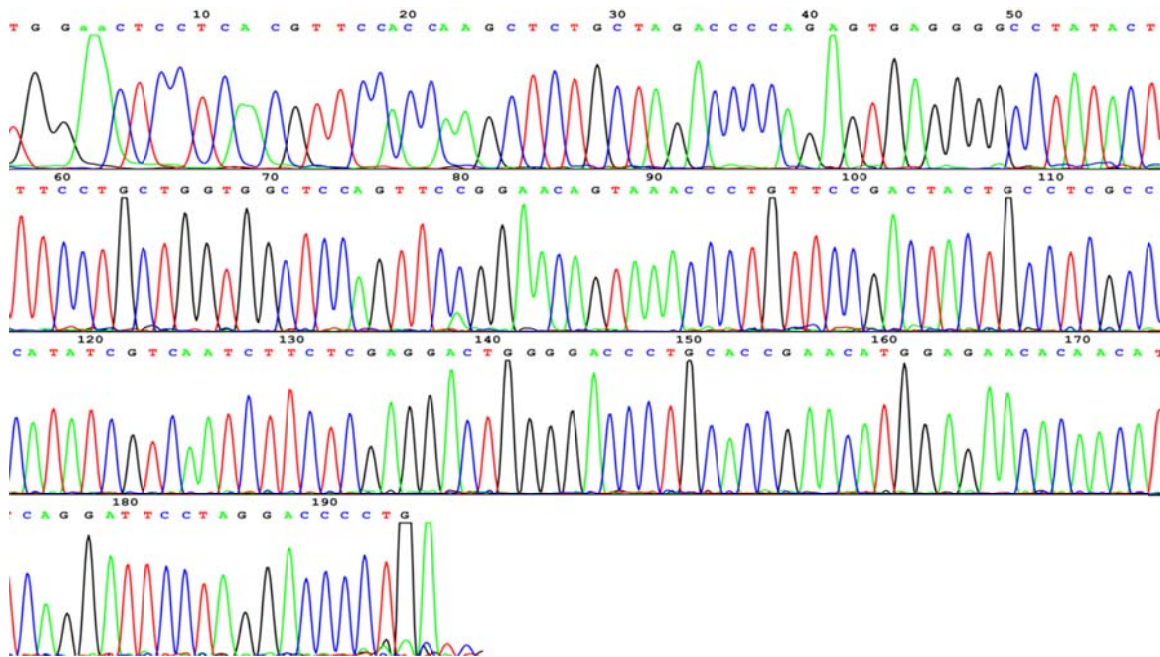

### H. HBV C4 type-specific sequence

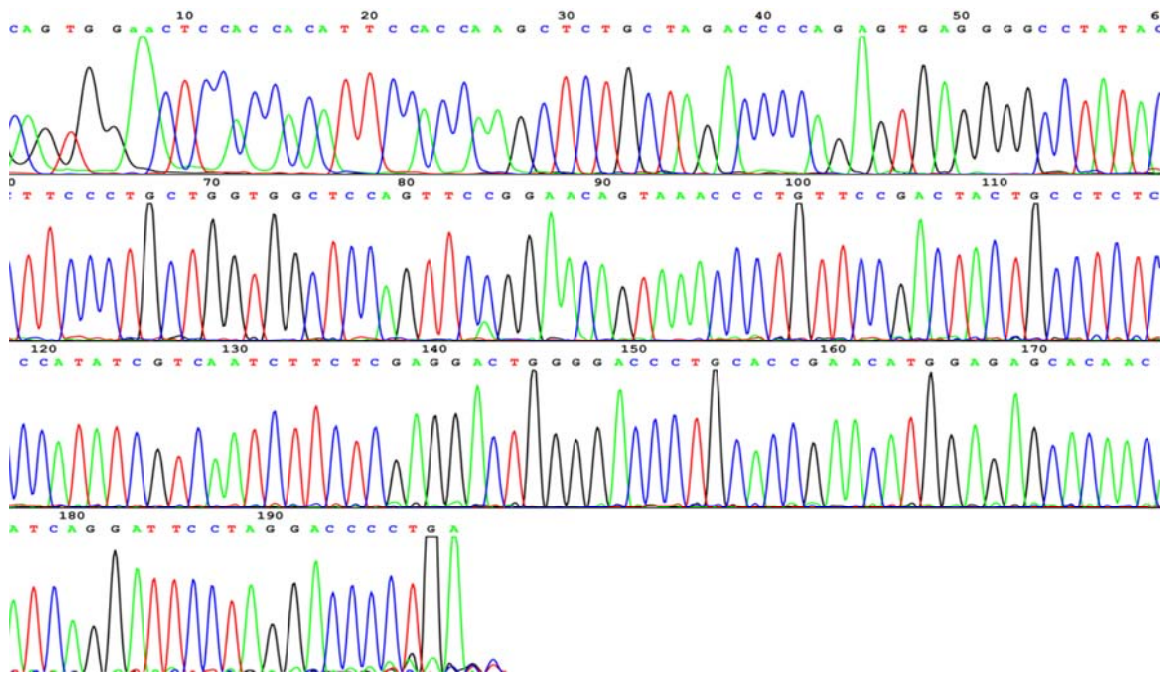

**Supplementary Figure 2.** HBV type-specific sequences including genotypes B and C and subgenotypes B2, C1, C2, C3 and C4. The sequences of subgenotypes C3 and C4 were obtained by sequencing the amplicon of genotype C.

**A. C1653T**

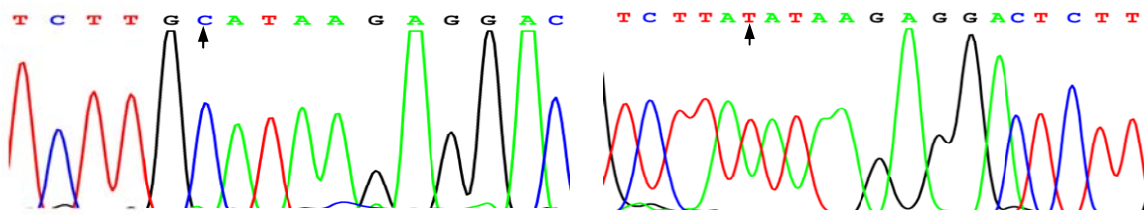

**B. C1673T**

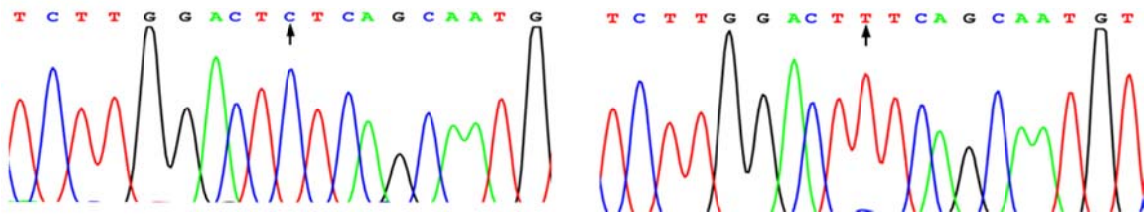

**C. T1674C/G**

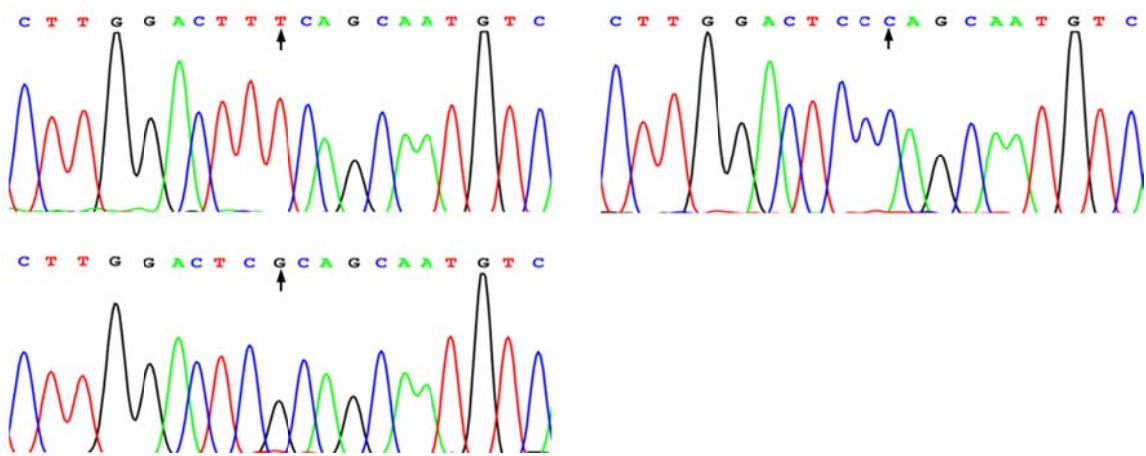

**D. A1703G**

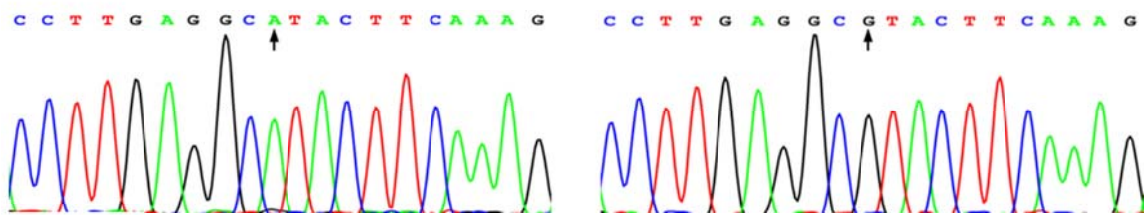

**E. G1719T**

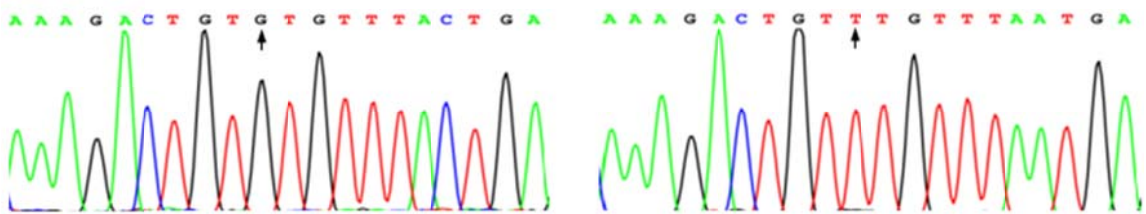

**F. A1726C**

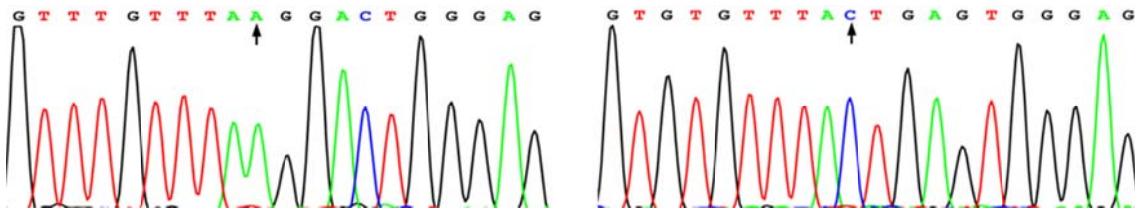

**G. T1727A/G**

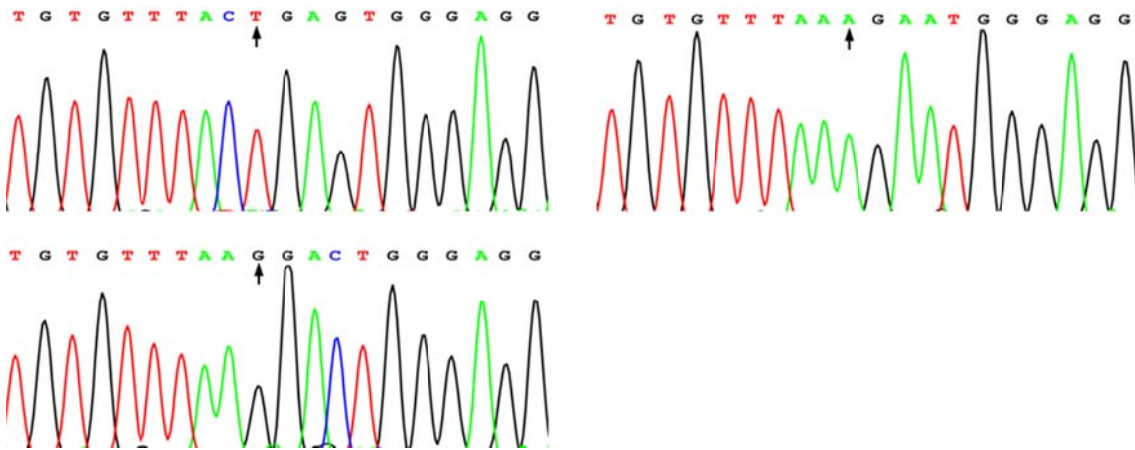

**H. C1730G**

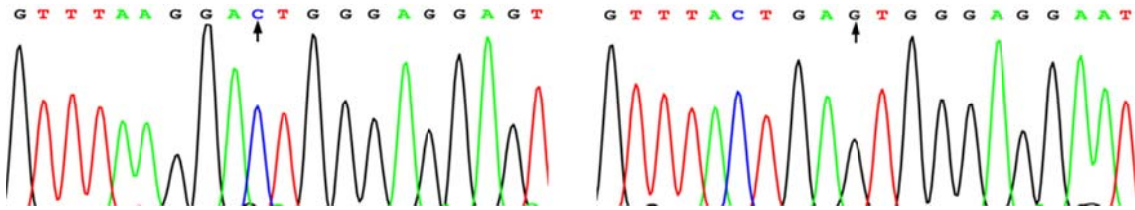

**I. A1752G**

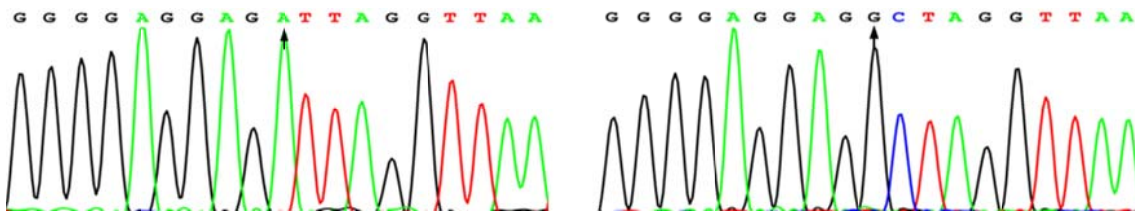

**J. T1753C**

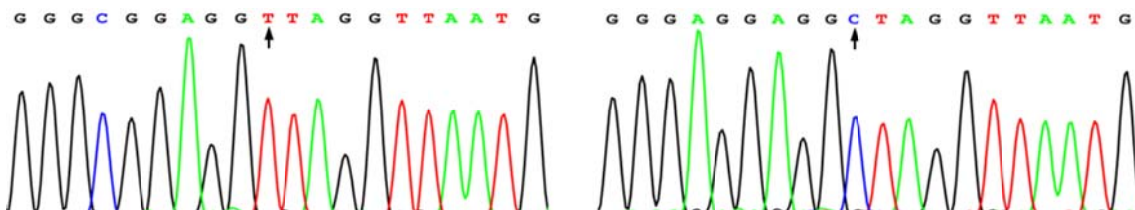



**K. A1762T/G1764A**

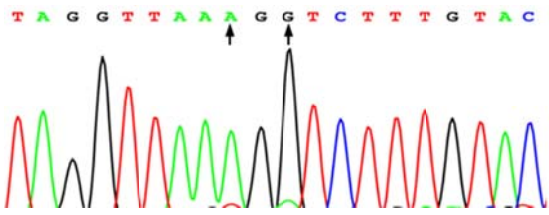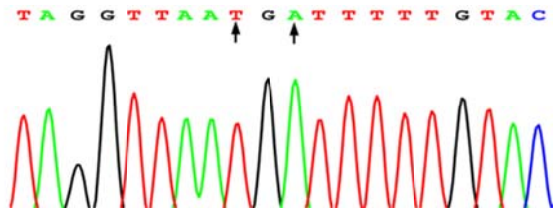

**L. C1799G**

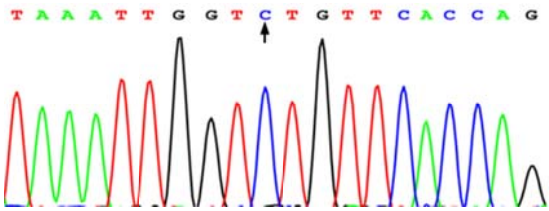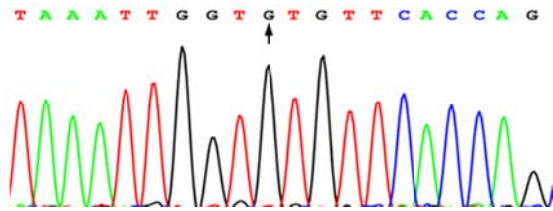

**M. A1846T**

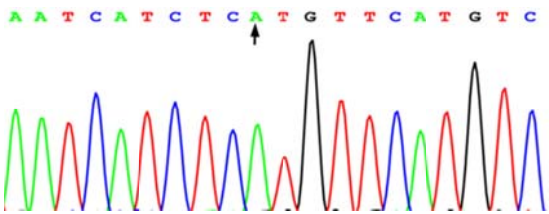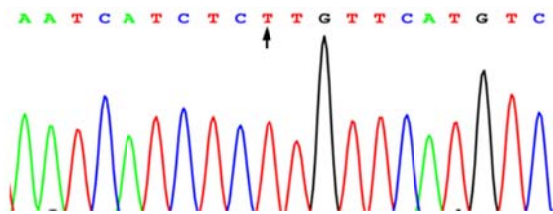

**N. G1896A**

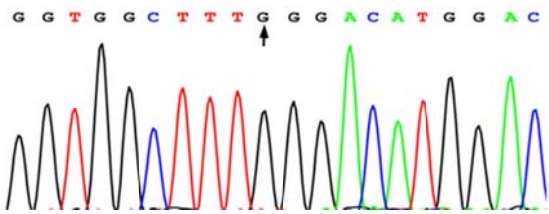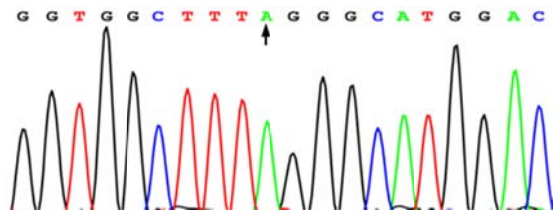

**O. G1899A**

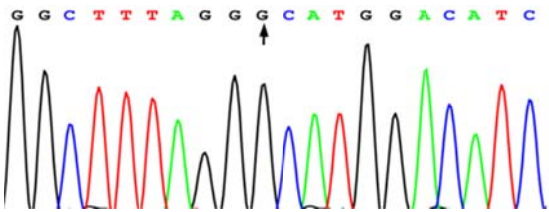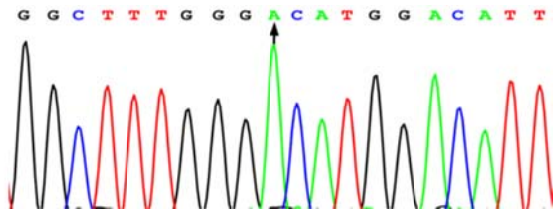

**P. G1915A/C**

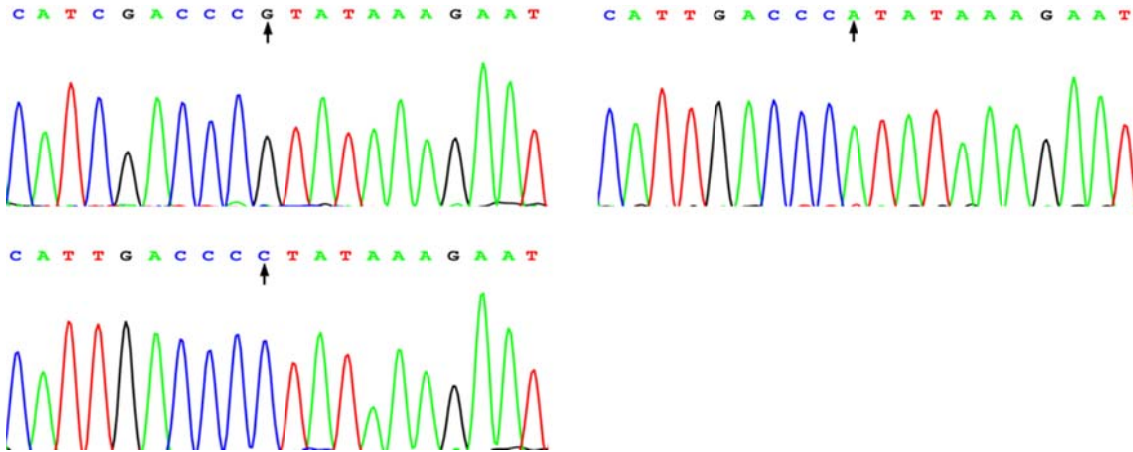

**Q. C1969T**

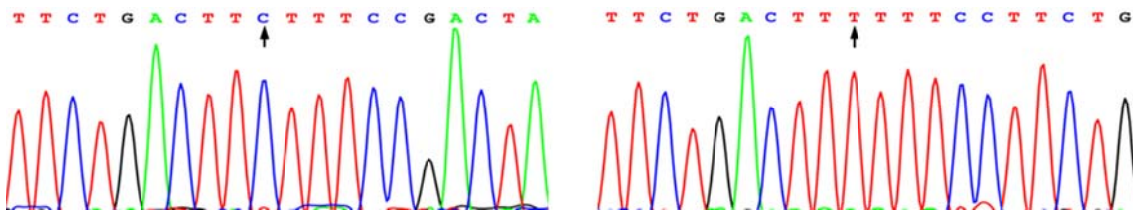

**R. A1979G**

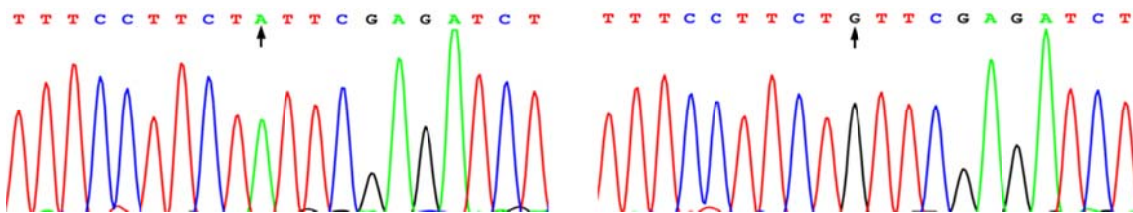

**Supplementary Figure 3.** The sequences of the HBV hotspot mutations in the EnhII/BCP/PC region including wild type and the mutation(s) of C1653T, C1673T, T1674C/G, A1703G, G1719T, A1726C, T1727A/G, C1730G, A1752G, T1753C, A1762T, G1764A, G1799C, A1846T, G1896A, G1899A, G1915A/C, C1969T and A1979G.

## Supplementary table

**Supplementary Table S1. Information of primers and probes**

| Type                                                                       | Primers or probes (5'-3')                      | Position  | Size (bp)<br>of product |
|----------------------------------------------------------------------------|------------------------------------------------|-----------|-------------------------|
| Nested PCR primers                                                         |                                                |           |                         |
| P1-S                                                                       | TTGCGGGTCACCATATTCTTGG                         | 2815-2837 | 1105                    |
| P1-AS                                                                      | CGAACCACTGAACAAATGGCACTAG                      | 680-704   |                         |
| P2-S                                                                       | CCTACTGTTCAAGCCTCCAAGC                         | 1856-1877 | 1026                    |
| P2-AS                                                                      | GACCAACCTCCCATGCTGTAG                          | 2861-2881 |                         |
| P3-S                                                                       | CCGGAAAGCTTGAGCTCTTCTTTTTTCACCTCTGC<br>CTAATCA | 1821-1860 | 3259                    |
| P3-AS                                                                      | CCGGAAAGCTTGAGCTCTTCAAAAAGTTGCATG<br>GTGCTGG   | 1825-1864 |                         |
| HBV Genotype primers                                                       |                                                |           |                         |
| A-S                                                                        | GGCTCCAGTTCAGGAACAGT                           | 64-83     | 68                      |
| A-AS                                                                       | CTCGCGGAGATTGACGAGATGT                         | 109-131   |                         |
| B-S                                                                        | CCAAACTCTTCAAGATCCCAGAGTCA                     | 16-41     | 331                     |
| B-AS                                                                       | ACAGGTTGGTGAGTGACTGGAGATTT                     | 321-346   |                         |
| C-S                                                                        | CTCCCATCTCTCCACCTCTAAGAGACAGT                  | 3164-3192 | 242                     |
| C-AS                                                                       | CAGGGGTCCTAGGAATCCTGATGTTG                     | 165-190   |                         |
| D-S                                                                        | CAGACGCCAACAAGGTAGGAGCT                        | 2972-2994 | 189                     |
| D-AS                                                                       | GAGTGTCTCTCAAAGGTGGAGACAGA                     | 3135-3160 |                         |
| E-S                                                                        | ATACCCTATGGAAGGCGGGCATCT                       | 2752-2775 | 130                     |
| E-AS                                                                       | CCCATTGAGAGGGACCGTCCA                          | 2860-2881 |                         |
| F-S                                                                        | TATCTGTGGGTATCCATTTGAATACCTC                   | 815-842   | 487                     |
| F-AS                                                                       | CGAGCGAAACAGGCTGCAAG                           | 1282-1301 |                         |
| HBV Subgenotype primers                                                    |                                                |           |                         |
| B1-S                                                                       | CCTTCTGACTTCTTTCCGTCGG                         | 1958-1979 | 237                     |
| B1-AS                                                                      | CCTGATCTTTAGGCCCATGTTAGTG                      | 2170-2194 |                         |
| B2-S                                                                       | GGGCTTTATTCTTCTACGGTACCTTG                     | 2487-2512 | 278                     |
| B2-AS                                                                      | TTCCAAAGAGTGTGTAATAATGTCTC                     | 2738-2764 |                         |
| C1-S                                                                       | CATTGTTACCTCACCATACAGCACTA                     | 2040-2066 | 554                     |
| C1-AS                                                                      | CATATTGTTGACATCTGTTGATAATATCCTCTTT             | 2560-2593 |                         |
| C2-S                                                                       | ATACTCTGTGGAAGGCTGGCATTC                       | 2752-2775 | 652                     |
| C2-AS                                                                      | GGGGTCCTAGGAATCCTGATGTTG                       | 165-188   |                         |
| Primers of enhancer II (EhnII), basic core promoter (BCP), precore regions |                                                |           |                         |
| BCP-1S                                                                     | TGCACTTCGCTTCACCTCTG                           | 1594-1613 | 736                     |
| BCP-1AS                                                                    | TAAGCGGGAGGAGTGCGAAT                           | 2310-2329 |                         |
| BCP-2S                                                                     | GCATGGAAACCACCGTGAAC                           | 1606-1625 | 438                     |
| BCP-2AS                                                                    | ATACAGAGCAGAGGCGGTAT                           | 2024-2043 |                         |
| Primers and probes for TaqMan allelic discrimination                       |                                                |           |                         |
| rs9272105-S                                                                | CAATTGTTTTTATAAGTTTCCTCTGCTTC                  |           |                         |



|               |                                    |
|---------------|------------------------------------|
| rs9272105-AS  | AGTCCTGTATGCTGATATCCAGTCAC         |
| rs9272105-P-A | FAM-TGATTGTGAGAG <u>ACC</u> -MGB   |
| rs9272105-P-G | HEX-TGATTGTGAGAG <u>GCC</u> -MGB   |
| rs9275319-S   | GACAGTGCAGCCTTCAGTCTGT             |
| rs9275319-AS  | GCGGTCTCCACCCTTCAT                 |
| rs9275319-P-C | FAM-TTGAAGGT <u>CCC</u> CAGAGC-MGB |
| rs9275319-P-T | HEX-TGAAGGT <u>CTC</u> CAGAGCC-MGB |

---

Abbreviation: S, sense; AS, antisense.

**Supplementary Table S2. Distribution of selected demographic variables in HCC and HBV persistent carriers**

| Variable | HCC patients                  |                               |                              | HBV persistent carriers            |                               |                               | All HCC patients<br>(n = 1507)<br>N (%) | All HBV persistent carriers<br>(n = 1560)<br>N (%) | P <sup>a</sup> |
|----------|-------------------------------|-------------------------------|------------------------------|------------------------------------|-------------------------------|-------------------------------|-----------------------------------------|----------------------------------------------------|----------------|
|          | Nanjing<br>(n = 535)<br>N (%) | Nantong<br>(n = 522)<br>N (%) | Qidong<br>(n = 450)<br>N (%) | Zhangjiagang<br>(n = 510)<br>N (%) | Taixing<br>(n = 500)<br>N (%) | Danyang<br>(n = 550)<br>N (%) |                                         |                                                    |                |
| Age      | 50.5±9.8                      | 51.3±9.9                      | 51.8±10.2                    | 50.8±7.3                           | 51.0±12.5                     | 51.5±11.6                     | 51.1±10.7                               | 51.2±10.0                                          | 0.835          |
| Gender   |                               |                               |                              |                                    |                               |                               |                                         |                                                    |                |
| Male     | 454 (84.9)                    | 409 (78.4)                    | 358 (79.6)                   | 409 (80.2)                         | 398 (79.6)                    | 448 (81.5)                    | 1221 (81.0)                             | 1255 (80.4)                                        | 0.687          |
| Female   | 81 (15.1)                     | 113 (21.6)                    | 92 (20.4)                    | 101 (19.8)                         | 102 (20.4)                    | 102 (18.5)                    | 286 (19.0)                              | 305 (19.6)                                         |                |

<sup>a</sup>All HCC patients vs. All HBV persistent carriers

**Supplementary Table S3. Distribution of selected demographic variables in the additional independent sample set from Xi'an**

| <b>Variable</b> | <b>HCC patients<br/>(n = 107) N (%)</b> | <b>HBV persistent carriers<br/>(n = 204) N (%)</b> | <b><i>P</i></b> |
|-----------------|-----------------------------------------|----------------------------------------------------|-----------------|
| Age             | 51.3±10.6                               | 50.1±10.3                                          | 0.336           |
| Gender          |                                         |                                                    |                 |
| Male            | 85 (79.4)                               | 164 (80.4)                                         | 0.842           |
| Female          | 22 (20.6)                               | 40 (19.6)                                          |                 |



**Supplementary Table S4. Distribution of HBV genotypes and subgenotypes in HCC and HBV persistent carriers from the central and southern Jiangsu Province**

| Variable         | HCC patients       |                    |                    | HBV persistent carriers |                    |                    |
|------------------|--------------------|--------------------|--------------------|-------------------------|--------------------|--------------------|
|                  | Nanjing            | Nantong            | Qidong             | Zhangjiagang            | Taixing            | Danyang            |
|                  | (n = 535)<br>N (%) | (n = 522)<br>N (%) | (n = 450)<br>N (%) | (n = 510)<br>N (%)      | (n = 500)<br>N (%) | (n = 550)<br>N (%) |
| No. of HBV typed | 520 (97.2)         | 516 (98.9)         | 435 (96.7)         | 509 (99.8)              | 485 (97.0)         | 542 (98.5)         |
| Genotype         |                    |                    |                    |                         |                    |                    |
| C                | 359 (69.0)         | 428 (82.9)         | 399 (91.7)         | 191 (37.5)              | 210 (43.3)         | 128 (23.6)         |
| B                | 120 (23.1)         | 26 (5.0)           | 13 (3.0)           | 62 (12.2)               | 237 (48.9)         | 330 (60.9)         |
| BC               | 40 (7.7)           | 61 (11.8)          | 20 (4.6)           | 255 (50.1)              | 36 (7.4)           | 84 (15.5)          |
| D                | 1 (0.2)            | 1 (0.2)            | 3 (0.7)            | 1 (0.2)                 | 2 (0.4)            | 0 (0.0)            |
| Subgenotype      |                    |                    |                    |                         |                    |                    |
| C2               | 315 (60.6)         | 365 (70.7)         | 305 (70.1)         | 172 (33.8)              | 170 (35.1)         | 108 (19.9)         |
| C1C2             | 8 (1.5)            | 27 (5.2)           | 34 (7.8)           | 6 (1.2)                 | 1 (0.2)            | 4 (0.7)            |
| C1               | 4 (0.8)            | 1 (0.2)            | 5 (1.1)            | 1 (0.2)                 | 2 (0.4)            | 2 (0.4)            |
| C3               | 28 (5.4)           | 28 (5.4)           | 55 (12.6)          | 10 (2.0)                | 37 (7.6)           | 14 (2.6)           |
| C4               | 4 (0.8)            | 7 (1.4)            | 0 (0.0)            | 2 (0.4)                 | 0 (0.0)            | 0 (0.0)            |
| B2               | 120 (23.1)         | 26 (5.0)           | 13 (3.0)           | 62 (12.2)               | 237 (48.9)         | 330 (60.9)         |
| B2C1             | 1 (0.2)            | 1 (0.2)            | 0 (0.0)            | 1 (0.2)                 | 0 (0.0)            | 1 (0.2)            |
| B2C1C2           | 0 (0.0)            | 4 (0.8)            | 4 (0.9)            | 2 (0.4)                 | 1 (0.2)            | 0 (0.0)            |
| B2C2             | 39 (7.5)           | 52 (10.1)          | 16 (3.7)           | 250 (49.1)              | 34 (7.0)           | 82 (15.1)          |
| B2C3             | 0 (0.0)            | 4 (0.8)            | 0 (0.0)            | 2 (0.4)                 | 1 (0.2)            | 1 (0.2)            |
| D                | 1 (0.2)            | 1 (0.2)            | 3 (0.7)            | 1 (0.2)                 | 2 (0.4)            | 0 (0.0)            |

**Supplementary Table S5. Distribution of HBV genotypes and subgenotypes in the additional independent sample set from Xi'an**

| <b>Variable</b>  | <b>HCC patients<br/>(n = 107) N (%)</b> | <b>HBV persistent carriers<br/>(n = 204) N (%)</b> | <b><i>P</i></b> |
|------------------|-----------------------------------------|----------------------------------------------------|-----------------|
| No. of HBV typed | 103 (96.3)                              | 197 (96.6)                                         | 0.889           |
| Genotype         |                                         |                                                    | <0.001          |
| C                | 80 (77.7)                               | 109 (55.3)                                         |                 |
| B                | 7 (6.8)                                 | 42 (21.3)                                          |                 |
| BC               | 11 (10.7)                               | 42 (21.3)                                          |                 |
| D                | 5 (4.9)                                 | 4 (2.0)                                            |                 |
| Subgenotype      |                                         |                                                    | 0.004           |
| C2               | 69 (67.0)                               | 97 (49.2)                                          |                 |
| C1C2             | 4 (3.9)                                 | 4 (2.0)                                            |                 |
| C3               | 5 (4.9)                                 | 7 (3.6)                                            |                 |
| C4               | 2 (1.9)                                 | 1 (0.5)                                            |                 |
| B2               | 7 (6.8)                                 | 42 (21.3)                                          |                 |
| B2C1             | 0 (0.0)                                 | 1 (0.5)                                            |                 |
| B2C1C2           | 1 (1.0)                                 | 0 (0.0)                                            |                 |
| B2C2             | 10 (9.7)                                | 40 (20.3)                                          |                 |
| B2C3             | 0 (0.0)                                 | 1 (0.5)                                            |                 |
| D                | 5 (4.9)                                 | 4 (2.0)                                            |                 |

**Supplementary Table S6. A nucleotide with the highest frequency at each site from HBV persistent carriers as wild type**

| Position      | Wild type | Position      | Wild type | Position      | Wild type | Position      | Wild type | Position      | Wild type | Position      | Wild type | Position      | Wild type |
|---------------|-----------|---------------|-----------|---------------|-----------|---------------|-----------|---------------|-----------|---------------|-----------|---------------|-----------|
| nt1653        | C         | nt1703        | A         | nt1753        | T         | nt1803        | T         | nt1853        | T         | nt1903        | G         | nt1953        | T         |
| nt1654        | A         | nt1704        | T         | nt1754        | T         | nt1804        | C         | nt1854        | G         | nt1904        | G         | nt1954        | T         |
| nt1655        | T         | nt1705        | A         | nt1755        | A         | nt1805        | A         | nt1855        | T         | nt1905        | A         | nt1955        | T         |
| nt1656        | A         | nt1706        | C         | nt1756        | G         | nt1806        | C         | nt1856        | C         | nt1906        | C         | nt1956        | T         |
| nt1657        | A         | nt1707        | T         | nt1757        | G         | nt1807        | C         | nt1857        | C         | nt1907        | A         | nt1957        | G         |
| nt1658        | G         | nt1708        | T         | nt1758        | T         | nt1808        | A         | nt1858        | T         | nt1908        | T         | nt1958        | C         |
| nt1659        | A         | nt1709        | C         | nt1759        | T         | nt1809        | G         | nt1859        | A         | nt1909        | T         | nt1959        | C         |
| nt1660        | G         | nt1710        | A         | nt1760        | A         | nt1810        | C         | nt1860        | C         | nt1910        | G         | nt1960        | T         |
| nt1661        | G         | nt1711        | A         | nt1761        | A         | nt1811        | A         | nt1861        | T         | nt1911        | A         | nt1961        | T         |
| nt1662        | A         | nt1712        | A         | <b>nt1762</b> | <b>A</b>  | nt1812        | C         | nt1862        | G         | nt1912        | C         | nt1962        | C         |
| nt1663        | C         | nt1713        | G         | nt1763        | G         | nt1813        | C         | nt1863        | T         | nt1913        | C         | nt1963        | T         |
| nt1664        | T         | nt1714        | A         | <b>nt1764</b> | <b>G</b>  | nt1814        | A         | nt1864        | T         | nt1914        | C         | nt1964        | G         |
| nt1665        | C         | nt1715        | C         | nt1765        | T         | nt1815        | T         | nt1865        | C         | <b>nt1915</b> | <b>G</b>  | nt1965        | A         |
| nt1666        | T         | nt1716        | T         | nt1766        | C         | nt1816        | G         | nt1866        | A         | nt1916        | T         | nt1966        | C         |
| nt1667        | T         | nt1717        | G         | nt1767        | T         | nt1817        | C         | nt1867        | A         | nt1917        | A         | nt1967        | T         |
| nt1668        | G         | nt1718        | T         | nt1768        | T         | nt1818        | A         | nt1868        | G         | nt1918        | T         | nt1968        | T         |
| nt1669        | G         | <b>nt1719</b> | <b>G</b>  | nt1769        | T         | nt1819        | A         | nt1869        | C         | nt1919        | A         | <b>nt1969</b> | <b>C</b>  |
| nt1670        | A         | nt1720        | T         | nt1770        | G         | nt1820        | C         | nt1870        | C         | nt1920        | A         | nt1970        | T         |
| nt1671        | C         | nt1721        | G         | nt1771        | T         | nt1821        | T         | nt1871        | T         | nt1921        | A         | nt1971        | T         |
| nt1672        | T         | nt1722        | T         | nt1772        | A         | nt1822        | T         | nt1872        | C         | nt1922        | G         | nt1972        | T         |
| <b>nt1673</b> | <b>C</b>  | nt1723        | T         | nt1773        | C         | nt1823        | T         | nt1873        | C         | nt1923        | A         | nt1973        | C         |
| <b>nt1674</b> | <b>T</b>  | nt1724        | T         | nt1774        | T         | nt1824        | T         | nt1874        | A         | nt1924        | A         | nt1974        | C         |
| nt1675        | C         | nt1725        | A         | nt1775        | A         | nt1825        | T         | nt1875        | A         | nt1925        | T         | nt1975        | T         |
| nt1676        | A         | <b>nt1726</b> | <b>A</b>  | nt1776        | G         | nt1826        | C         | nt1876        | G         | nt1926        | T         | nt1976        | T         |
| nt1677        | G         | <b>nt1727</b> | <b>T</b>  | nt1777        | G         | nt1827        | A         | nt1877        | C         | nt1927        | T         | nt1977        | C         |
| nt1678        | C         | nt1728        | G         | nt1778        | A         | nt1828        | C         | nt1878        | T         | nt1928        | G         | nt1978        | T         |
| nt1679        | A         | nt1729        | A         | nt1779        | G         | nt1829        | C         | nt1879        | G         | nt1929        | G         | <b>nt1979</b> | <b>A</b>  |
| nt1680        | A         | <b>nt1730</b> | <b>C</b>  | nt1780        | G         | nt1830        | T         | nt1880        | T         | nt1930        | A         | nt1980        | T         |
| nt1681        | T         | nt1731        | T         | nt1781        | C         | nt1831        | C         | nt1881        | G         | nt1931        | G         | nt1981        | T         |
| nt1682        | G         | nt1732        | G         | nt1782        | T         | nt1832        | T         | nt1882        | C         | nt1932        | C         | nt1982        | C         |
| nt1683        | T         | nt1733        | G         | nt1783        | G         | nt1833        | G         | nt1883        | C         | nt1933        | T         | nt1983        | G         |
| nt1684        | C         | nt1734        | G         | nt1784        | T         | nt1834        | C         | nt1884        | T         | nt1934        | T         | nt1984        | A         |
| nt1685        | A         | nt1735        | A         | nt1785        | A         | nt1835        | C         | nt1885        | T         | nt1935        | C         | nt1985        | G         |
| nt1686        | A         | nt1736        | G         | nt1786        | G         | nt1836        | T         | nt1886        | G         | nt1936        | T         | nt1986        | A         |
| nt1687        | C         | nt1737        | G         | nt1787        | G         | nt1837        | A         | nt1887        | G         | nt1937        | G         | nt1987        | T         |
| nt1688        | G         | nt1738        | A         | nt1788        | C         | nt1838        | A         | nt1888        | G         | nt1938        | T         | nt1988        | C         |
| nt1689        | A         | nt1739        | G         | nt1789        | A         | nt1839        | T         | nt1889        | T         | nt1939        | G         | nt1989        | T         |
| nt1690        | C         | nt1740        | T         | nt1790        | T         | nt1840        | C         | nt1890        | G         | nt1940        | G         | nt1990        | C         |
| nt1691        | C         | nt1741        | T         | nt1791        | A         | nt1841        | A         | nt1891        | G         | nt1941        | A         | nt1991        | C         |
| nt1692        | G         | nt1742        | G         | nt1792        | A         | nt1842        | T         | nt1892        | C         | nt1942        | G         | nt1992        | T         |
| nt1693        | A         | nt1743        | G         | nt1793        | A         | nt1843        | C         | nt1893        | T         | nt1943        | T         | nt1993        | C         |
| nt1694        | C         | nt1744        | G         | nt1794        | T         | nt1844        | T         | nt1894        | T         | nt1944        | T         | nt1994        | G         |
| nt1695        | C         | nt1745        | G         | nt1795        | T         | nt1845        | C         | nt1895        | T         | nt1945        | A         | nt1995        | A         |
| nt1696        | T         | nt1746        | G         | nt1796        | G         | <b>nt1846</b> | <b>A</b>  | <b>nt1896</b> | <b>G</b>  | nt1946        | C         | nt1996        | T         |
| nt1697        | T         | nt1747        | A         | nt1797        | G         | nt1847        | T         | nt1897        | G         | nt1947        | T         | nt1997        | A         |
| nt1698        | G         | nt1748        | G         | nt1798        | T         | nt1848        | G         | nt1898        | G         | nt1948        | C         | nt1998        | C         |
| nt1699        | A         | nt1749        | G         | <b>nt1799</b> | <b>G</b>  | nt1849        | T         | <b>nt1899</b> | <b>G</b>  | nt1949        | T         | nt1999        | C         |
| nt1700        | G         | nt1750        | A         | nt1800        | T         | nt1850        | T         | nt1900        | C         | nt1950        | C         | nt2000        | G         |
| nt1701        | G         | nt1751        | G         | nt1801        | G         | nt1851        | C         | nt1901        | A         | nt1951        | T         |               |           |
| nt1702        | C         | <b>nt1752</b> | <b>A</b>  | nt1802        | T         | nt1852        | A         | nt1902        | T         | nt1952        | T         |               |           |

Note: The bold represents hotspot sites with combined mutation frequencies > 10% from all the participants.



**Supplementary Table S7. The associations of the hotspot mutations in the EnhII/BCP/PC region of HBV in HCC patients, as compared with HBV persistent carriers**

| Substitutions | HCC patients<br>(n = 1471)<br>N (%) | HBV persistent carriers<br>(n = 1536)<br>N (%) | OR (95%CI) <sup>a</sup> | P <sup>a</sup>         | OR (95%CI) <sup>b</sup> | P <sup>b</sup>        |
|---------------|-------------------------------------|------------------------------------------------|-------------------------|------------------------|-------------------------|-----------------------|
| C1653T        |                                     |                                                |                         |                        |                         |                       |
| C             | 928 (70.7)                          | 1273 (90.1)                                    | 1.00                    |                        | 1.00                    |                       |
| T             | 385 (29.3)                          | 140 (9.9)                                      | 3.78 (3.06-4.67)        | 5.82×10 <sup>-35</sup> | 2.17 (1.67-2.80)        | 4.48×10 <sup>-9</sup> |
| C1673T        |                                     |                                                |                         |                        |                         |                       |
| C             | 1151 (87.9)                         | 766 (55.1)                                     | 1.00                    |                        | 1.00                    |                       |
| T             | 158 (12.1)                          | 624 (44.9)                                     | 0.17 (0.14-0.20)        | 1.97×10 <sup>-70</sup> | 0.57 (0.35-0.92)        | 2.05×10 <sup>-2</sup> |
| T1674C/G      |                                     |                                                |                         |                        |                         |                       |
| T             | 857 (65.6)                          | 1244 (88.2)                                    | 1.00                    |                        | 1.00                    |                       |
| C/G           | 449 (34.4)                          | 167 (11.8)                                     | 3.91 (3.21-4.76)        | 1.55×10 <sup>-41</sup> | 1.90 (1.49-2.42)        | 2.79×10 <sup>-7</sup> |
| A1703G        |                                     |                                                |                         |                        |                         |                       |
| A             | 1155 (88.3)                         | 1291 (91.6)                                    | 1.00                    |                        | 1.00                    |                       |
| G             | 153 (11.7)                          | 119 (8.4)                                      | 1.44 (1.12-1.85)        | 4.96×10 <sup>-3</sup>  | 0.94 (0.68-1.29)        | 7.04×10 <sup>-1</sup> |
| G1719T        |                                     |                                                |                         |                        |                         |                       |
| G             | 324 (24.7)                          | 816 (57.7)                                     | 1.00                    |                        | 1.00                    |                       |
| T             | 989 (75.3)                          | 597 (42.3)                                     | 4.19 (3.56-4.94)        | 1.48×10 <sup>-65</sup> | 1.12 (0.81-1.55)        | 4.96×10 <sup>-1</sup> |
| A1726C        |                                     |                                                |                         |                        |                         |                       |
| A             | 1174 (89.4)                         | 866 (61.3)                                     | 1.00                    |                        | 1.00                    |                       |
| C             | 139 (10.6)                          | 547 (38.7)                                     | 0.19 (0.15-0.23)        | 2.59×10 <sup>-57</sup> | 0.82 (0.51-1.32)        | 4.17×10 <sup>-1</sup> |
| T1727A/G      |                                     |                                                |                         |                        |                         |                       |
| T             | 169 (12.9)                          | 671 (47.6)                                     | 1.00                    |                        | 1.00                    |                       |
| A/G           | 1144 (87.1)                         | 740 (52.4)                                     | 6.17 (5.09-7.48)        | 1.68×10 <sup>-76</sup> | 1.19 (0.67-2.12)        | 5.50×10 <sup>-1</sup> |
| C1730G        |                                     |                                                |                         |                        |                         |                       |
| C             | 1140 (87.5)                         | 778 (55.6)                                     | 1.00                    |                        | 1.00                    |                       |
| G             | 163 (12.5)                          | 622 (44.4)                                     | 0.18 (0.15-0.22)        | 3.86×10 <sup>-67</sup> | 2.07 (1.02-4.20)        | 4.47×10 <sup>-2</sup> |
| A1752G        |                                     |                                                |                         |                        |                         |                       |
| A             | 1211 (92.6)                         | 925 (65.7)                                     | 1.00                    |                        | 1.00                    |                       |
| G             | 97 (7.4)                            | 482 (34.3)                                     | 0.15 (0.12-0.19)        | 1.82×10 <sup>-55</sup> | 0.31 (0.20-0.48)        | 7.63×10 <sup>-8</sup> |
| T1753C        |                                     |                                                |                         |                        |                         |                       |
| T             | 896 (70.3)                          | 1213 (88.7)                                    | 1.00                    |                        | 1.00                    |                       |
| C             | 378 (29.7)                          | 154 (11.3)                                     | 3.33 (2.71-4.10)        | 3.24×10 <sup>-30</sup> | 1.67 (1.29-2.15)        | 8.01×10 <sup>-5</sup> |
| A1762T        |                                     |                                                |                         |                        |                         |                       |
| A             | 228 (17.4)                          | 761 (53.9)                                     | 1.00                    |                        | 1.00                    |                       |
| T             | 1085 (82.6)                         | 652 (46.1)                                     | 5.56 (4.66-6.64)        | 2.07×10 <sup>-80</sup> | 1.85 (1.31-2.61)        | 4.72×10 <sup>-4</sup> |
| G1764A        |                                     |                                                |                         |                        |                         |                       |
| G             | 160 (12.2)                          | 723 (51.2)                                     | 1.00                    |                        | 1.00                    |                       |
| A             | 1151 (87.8)                         | 690 (48.8)                                     | 7.57 (6.23-9.21)        | 2.58×10 <sup>-91</sup> | 2.60 (1.79-3.77)        | 4.45×10 <sup>-7</sup> |
| G1799C        |                                     |                                                |                         |                        |                         |                       |
| G             | 171 (13.0)                          | 651 (46.1)                                     | 1.00                    |                        | 1.00                    |                       |
| C             | 1142 (87.0)                         | 761 (53.9)                                     | 5.74 (4.74-6.96)        | 3.66×10 <sup>-71</sup> | 1.15 (0.65-2.06)        | 6.33×10 <sup>-1</sup> |
| A1846T        |                                     |                                                |                         |                        |                         |                       |
| A             | 881 (67.8)                          | 991 (70.9)                                     | 1.00                    |                        | 1.00                    |                       |
| T             | 419 (32.2)                          | 406 (29.1)                                     | 1.16 (0.99-1.37)        | 7.48×10 <sup>-2</sup>  | 0.80 (0.63-1.02)        | 7.46×10 <sup>-2</sup> |
| G1896A        |                                     |                                                |                         |                        |                         |                       |
| G             | 635 (48.4)                          | 731 (51.7)                                     | 1.00                    |                        | 1.00                    |                       |
| A             | 677 (51.6)                          | 682 (48.3)                                     | 1.14 (0.98-1.33)        | 8.04×10 <sup>-2</sup>  | 1.18 (0.96-1.46)        | 1.19×10 <sup>-1</sup> |

|          |             |             |                  |                        |                  |                       |
|----------|-------------|-------------|------------------|------------------------|------------------|-----------------------|
| G1899A   |             |             |                  |                        |                  |                       |
| G        | 1001 (76.2) | 1221 (86.4) | 1.00             |                        | 1.00             |                       |
| A        | 312 (23.8)  | 192 (13.6)  | 1.99 (1.63-2.42) | $1.32 \times 10^{-11}$ | 1.77 (1.35-2.32) | $3.33 \times 10^{-5}$ |
| G1915A/C |             |             |                  |                        |                  |                       |
| G        | 1123 (85.8) | 1267 (90.2) | 1.00             |                        | 1.00             |                       |
| A/C      | 186 (14.2)  | 137 (9.8)   | 1.53 (1.21-1.94) | $3.62 \times 10^{-4}$  | 1.48 (1.08-2.03) | $1.40 \times 10^{-2}$ |
| C1969T   |             |             |                  |                        |                  |                       |
| C        | 1102 (83.9) | 1328 (94.0) | 1.00             |                        | 1.00             |                       |
| T        | 211 (16.1)  | 85 (6.0)    | 2.99 (2.30-3.89) | $4.39 \times 10^{-16}$ | 2.01 (1.47-2.76) | $1.36 \times 10^{-5}$ |
| A1979G   |             |             |                  |                        |                  |                       |
| A        | 1126 (85.8) | 1237 (87.7) | 1.00             |                        | 1.00             |                       |
| G        | 187 (14.2)  | 174 (12.3)  | 1.18 (0.95-1.47) | $1.44 \times 10^{-1}$  | 1.06 (0.79-1.41) | $7.06 \times 10^{-1}$ |

<sup>a</sup> Logistic regression analyses adjusted for age and gender between HCC patients and HBV persistent carriers.

<sup>b</sup> Logistic regression analyses adjusted for age, gender and all the other mutations between HCC patients and HBV persistent carriers.

**Supplementary Table S8. The LD information (pairwise  $r^2$ ) for the hotspot mutations in the EnhII/BCP/PC region of HBV**

| Mutations    | C1653<br>T | C1673<br>T | T1674C/<br>G | A1703<br>G | G1719<br>T | A1726<br>C | T1727A/<br>G | C1730<br>G | A1752<br>G | T1753<br>C | A1762<br>T | G1764<br>A | G1799<br>C | A1846<br>T | G1896<br>A | G1899<br>A | G1915A/<br>C | C1969<br>T |
|--------------|------------|------------|--------------|------------|------------|------------|--------------|------------|------------|------------|------------|------------|------------|------------|------------|------------|--------------|------------|
| C1653T       | -          | -          | -            | -          | -          | -          | -            | -          | -          | -          | -          | -          | -          | -          | -          | -          | -            | -          |
| C1673T       | 0.042      | -          | -            | -          | -          | -          | -            | -          | -          | -          | -          | -          | -          | -          | -          | -          | -            | -          |
| T1674C/<br>G | 0.013      | 0.097      | -            | -          | -          | -          | -            | -          | -          | -          | -          | -          | -          | -          | -          | -          | -            | -          |
| A1703G       | 0.000      | 0.029      | 0.008        | -          | -          | -          | -            | -          | -          | -          | -          | -          | -          | -          | -          | -          | -            | -          |
| G1719T       | 0.038      | 0.514      | 0.149        | 0.055      | -          | -          | -            | -          | -          | -          | -          | -          | -          | -          | -          | -          | -            | -          |
| A1726C       | 0.036      | 0.596      | 0.081        | 0.024      | 0.436      | -          | -            | -          | -          | -          | -          | -          | -          | -          | -          | -          | -            | -          |
| T1727A/<br>G | 0.049      | 0.714      | 0.107        | 0.032      | 0.554      | 0.704      | -            | -          | -          | -          | -          | -          | -          | -          | -          | -          | -            | -          |
| C1730G       | 0.046      | 0.762      | 0.097        | 0.031      | 0.550      | 0.701      | 0.822        | -          | -          | -          | -          | -          | -          | -          | -          | -          | -            | -          |
| A1752G       | 0.032      | 0.519      | 0.074        | 0.021      | 0.364      | 0.402      | 0.551        | 0.604      | -          | -          | -          | -          | -          | -          | -          | -          | -            | -          |
| T1753C       | 0.014      | 0.049      | 0.014        | 0.011      | 0.042      | 0.038      | 0.053        | 0.048      | 0.030      | -          | -          | -          | -          | -          | -          | -          | -            | -          |
| A1762T       | 0.044      | 0.064      | 0.026        | 0.004      | 0.072      | 0.053      | 0.082        | 0.059      | 0.016      | 0.084      | -          | -          | -          | -          | -          | -          | -            | -          |
| G1764A       | 0.052      | 0.096      | 0.054        | 0.003      | 0.118      | 0.081      | 0.122        | 0.093      | 0.031      | 0.078      | 0.735      | -          | -          | -          | -          | -          | -            | -          |
| G1799C       | 0.043      | 0.717      | 0.106        | 0.031      | 0.547      | 0.633      | 0.797        | 0.846      | 0.585      | 0.044      | 0.064      | 0.095      | -          | -          | -          | -          | -            | -          |
| A1846T       | 0.013      | 0.013      | 0.001        | 0.000      | 0.013      | 0.024      | 0.017        | 0.027      | 0.005      | 0.001      | 0.007      | 0.008      | 0.025      | -          | -          | -          | -            | -          |
| G1896A       | 0.008      | 0.010      | 0.000        | 0.004      | 0.008      | 0.025      | 0.017        | 0.029      | 0.006      | 0.001      | 0.002      | 0.005      | 0.024      | 0.135      | -          | -          | -            | -          |
| G1899A       | 0.014      | 0.001      | 0.001        | 0.001      | 0.001      | 0.003      | 0.001        | 0.002      | 0.000      | 0.013      | 0.013      | 0.017      | 0.004      | 0.112      | 0.005      | -          | -            | -          |
| G1915A/<br>C | 0.001      | 0.014      | 0.003        | 0.001      | 0.019      | 0.012      | 0.017        | 0.015      | 0.010      | 0.002      | 0.000      | 0.000      | 0.014      | 0.006      | 0.000      | 0.004      | -            | -          |
| C1969T       | 0.006      | 0.015      | 0.008        | 0.014      | 0.020      | 0.016      | 0.021        | 0.015      | 0.009      | 0.006      | 0.008      | 0.013      | 0.015      | 0.001      | 0.003      | 0.007      | 0.000        | -          |
| A1979G       | 0.000      | 0.000      | 0.000        | 0.000      | 0.002      | 0.001      | 0.001        | 0.002      | 0.000      | 0.005      | 0.004      | 0.005      | 0.002      | 0.004      | 0.033      | 0.000      | 0.000        | 0.003      |



**Supplementary Table S9. Association between two SNPs and HBV-related HCC susceptibility**

| Genotype  | HCC patients       |                    |                    | HBV persistent carriers |                    |                    | All HCC patients<br>(n = 1507)<br>N (%) | All HBV persistent carriers<br>(n = 1560)<br>N (%) | OR (95%CI) <sup>a</sup> | P <sup>a</sup>         |
|-----------|--------------------|--------------------|--------------------|-------------------------|--------------------|--------------------|-----------------------------------------|----------------------------------------------------|-------------------------|------------------------|
|           | Nanjing            | Nantong            | Qidong             | Zhangjiagang            | Taixing            | Danyang            |                                         |                                                    |                         |                        |
|           | (n = 535)<br>N (%) | (n = 522)<br>N (%) | (n = 450)<br>N (%) | (n = 510)<br>N (%)      | (n = 500)<br>N (%) | (n = 550)<br>N (%) |                                         |                                                    |                         |                        |
| rs9272105 |                    |                    |                    |                         |                    |                    |                                         |                                                    |                         |                        |
| G/G       | 131 (24.9)         | 133 (25.8)         | 111 (24.7)         | 152 (30.0)              | 158 (32.2)         | 180 (33.3)         | 375 (25.2)                              | 490 (31.9)                                         | 1.00                    |                        |
| G/A       | 237 (45.1)         | 266 (51.7)         | 216 (48.1)         | 246 (48.6)              | 244 (49.7)         | 258 (47.7)         | 719 (48.3)                              | 748 (48.6)                                         | 1.25 (1.06-1.49)        | 8.793×10 <sup>-3</sup> |
| A/A       | 158 (30.0)         | 116 (22.5)         | 122 (27.2)         | 108 (21.3)              | 89 (18.1)          | 103 (19.0)         | 396 (26.6)                              | 300 (19.5)                                         | 1.72 (1.41-2.11)        | 1.158×10 <sup>-7</sup> |
| Dominant  |                    |                    |                    |                         |                    |                    |                                         |                                                    | 1.39 (1.19-1.63)        | 4.703×10 <sup>-5</sup> |
| Recessive |                    |                    |                    |                         |                    |                    |                                         |                                                    | 1.50 (1.26-1.77)        | 3.472×10 <sup>-6</sup> |
| Additive  |                    |                    |                    |                         |                    |                    |                                         |                                                    | 1.31 (1.18-1.45)        | 1.183×10 <sup>-7</sup> |
| rs9275319 |                    |                    |                    |                         |                    |                    |                                         |                                                    |                         |                        |
| A/A       | 456 (87.0)         | 434 (83.6)         | 374 (83.1)         | 383 (75.4)              | 377 (76.9)         | 438 (81.3)         | 1264 (84.7)                             | 1198 (77.9)                                        | 1.00                    |                        |
| G/A       | 65 (12.4)          | 81 (15.6)          | 71 (15.8)          | 117 (23.0)              | 105 (21.4)         | 91 (16.9)          | 217 (14.5)                              | 313 (20.4)                                         | 0.66 (0.54-0.79)        | 1.491×10 <sup>-5</sup> |
| G/G       | 3 (0.6)            | 4 (0.8)            | 5 (1.1)            | 8 (1.6)                 | 8 (1.6)            | 10 (1.9)           | 12 (0.8)                                | 26 (1.7)                                           | 0.44 (0.22-0.88)        | 1.928×10 <sup>-2</sup> |
| Dominant  |                    |                    |                    |                         |                    |                    |                                         |                                                    | 0.64 (0.53-0.77)        | 1.969×10 <sup>-6</sup> |
| Recessive |                    |                    |                    |                         |                    |                    |                                         |                                                    | 0.47 (0.24-0.94)        | 2.718×10 <sup>-2</sup> |
| Additive  |                    |                    |                    |                         |                    |                    |                                         |                                                    | 0.66 (0.56-0.78)        | 1.008×10 <sup>-6</sup> |

<sup>a</sup> Logistic regression analyses adjusted for age and gender between all HCC patients and all HBV persistent carriers.

**Supplementary Table S10. Stratified analyses on rs9272105 and rs9275319 with HCC susceptibility**

| HBV genotype             | HCC patients  | HBV persistent carriers | OR (95% CI)      | <i>P</i> <sup>a</sup> |
|--------------------------|---------------|-------------------------|------------------|-----------------------|
| rs9272105 (GG / GA / AA) |               |                         |                  |                       |
| Stratification model 1   |               |                         |                  |                       |
| B                        | 32 /67 /55    | 182 /313 /122           | 1.63 (1.27-2.10) | 0.118                 |
| BC                       | 20 /69 /31    | 126 /174 /72            | 1.62 (1.20-2.18) |                       |
| C                        | 312 /566 /297 | 170 /252 /101           | 1.26 (1.09-1.46) |                       |
| Stratification model 2   |               |                         |                  |                       |
| B-related <sup>b</sup>   | 52 /136 /86   | 308 /487 /194           | 1.61 (1.33-1.95) | 0.046                 |
| Non-B <sup>c</sup>       | 171 /253 /102 | 312 /569 /299           | 1.26 (1.09-1.46) |                       |
| rs9275319 (AA / GA / GG) |               |                         |                  |                       |
| Stratification model 1   |               |                         |                  |                       |
| B                        | 138 /18 / 1   | 496 /110 /10            | 0.58 (0.36-0.94) | 0.949                 |
| BC                       | 101 /19 / 1   | 282 /80 /9              | 0.64 (0.39-1.04) |                       |
| C                        | 989 /176 /9   | 399 /118 /6             | 0.63 (0.50-0.80) |                       |
| Stratification model 2   |               |                         |                  |                       |
| B-related <sup>b</sup>   | 239 /37 /2    | 778 /190 /19            | 0.62 (0.44-0.88) | 0.883                 |
| Non-B <sup>c</sup>       | 994 /176 /9   | 402 /118 /6             | 0.64 (0.50-0.81) |                       |

Note: Logistic regression analyses adjusted for age and gender in the additive genetic model.

<sup>a</sup> P-value for the heterogeneity test.

<sup>b</sup> B-related genotypes including B, BC.

<sup>c</sup> Non-B genotypes including C, D.

**Supplementary Table S11. Contributions of the multiplicative interactions of HLA SNPs with HBV mutations in the EnhII/BCP/PC region of HBV to HCC risk**

| SNP * Mutation       | OR (95% CI)      | <i>P</i> | SNP * Mutation       | OR (95% CI)      | <i>P</i> |
|----------------------|------------------|----------|----------------------|------------------|----------|
| rs9272105 * C1653T   | 0.88 (0.66-1.19) | 0.417    | rs9275319 * C1653T   | 1.43 (0.84-2.45) | 0.189    |
| rs9272105 * C1673T   | 1.43 (1.07-1.90) | 0.016    | rs9275319 * C1673T   | 0.76 (0.45-1.31) | 0.327    |
| rs9272105 * T1674C/G | 0.90 (0.68-1.18) | 0.442    | rs9275319 * T1674C/G | 0.77 (0.49-1.21) | 0.260    |
| rs9272105 * A1703G   | 1.00 (0.69-1.43) | 0.979    | rs9275319 * A1703G   | 0.94 (0.52-1.71) | 0.844    |
| rs9272105 * G1719T   | 0.76 (0.60-0.96) | 0.020    | rs9275319 * G1719T   | 1.07 (0.71-1.61) | 0.747    |
| rs9272105 * A1726C   | 1.38 (1.02-1.86) | 0.039    | rs9275319 * A1726C   | 0.78 (0.45-1.35) | 0.374    |
| rs9272105 * T1727A/G | 0.75 (0.57-1.00) | 0.051    | rs9275319 * T1727A/G | 1.26 (0.75-2.10) | 0.389    |
| rs9272105 * C1730G   | 1.36 (1.02-1.81) | 0.035    | rs9275319 * C1730G   | 0.90 (0.53-1.52) | 0.692    |
| rs9272105 * A1752G   | 1.84 (1.30-2.61) | 0.001    | rs9275319 * A1752G   | 0.57 (0.28-1.18) | 0.131    |
| rs9272105 * T1753C   | 1.06 (0.78-1.43) | 0.726    | rs9275319 * T1753C   | 1.02 (0.64-1.63) | 0.937    |
| rs9272105 * A1762T   | 0.96 (0.75-1.24) | 0.763    | rs9275319 * A1762T   | 1.36 (0.86-2.16) | 0.191    |
| rs9272105 * G1764A   | 0.77 (0.58-1.01) | 0.063    | rs9275319 * G1764A   | 1.09 (0.66-1.81) | 0.725    |
| rs9272105 * G1799C   | 0.70 (0.53-0.93) | 0.014    | rs9275319 * G1799C   | 1.16 (0.69-1.95) | 0.574    |
| rs9272105 * A1846T   | 1.17 (0.92-1.48) | 0.191    | rs9275319 * A1846T   | 0.77 (0.51-1.15) | 0.205    |
| rs9272105 * G1896A   | 0.94 (0.76-1.17) | 0.590    | rs9275319 * G1896A   | 0.83 (0.58-1.20) | 0.321    |
| rs9272105 * G1899A   | 1.11 (0.84-1.48) | 0.450    | rs9275319 * G1899A   | 1.02 (0.62-1.68) | 0.935    |
| rs9272105 * G1915A/C | 1.15 (0.82-1.60) | 0.415    | rs9275319 * G1915A/C | 1.24 (0.72-2.14) | 0.431    |
| rs9272105 * C1969T   | 1.26 (0.85-1.86) | 0.243    | rs9275319 * C1969T   | 1.22 (0.64-2.32) | 0.551    |
| rs9272105 * A1979G   | 1.01 (0.74-1.40) | 0.928    | rs9275319 * A1979G   | 1.45 (0.84-2.52) | 0.187    |

Note: Logistic regression analyses adjusted for age and gender in the additive genetic model.
